# Supplementary material for: Structural and thermodynamic study of Ca A- or Co B-site substituted SrFeO3−δ perovskites for low temperature chemical looping applications
Source: Royal Society of Chemistry journal article supplement (doi:10.1039/d0cp01049a), 2020-01-01
Supplement: d0cp01049a1.pdf [file d0cp01049a1.pdf]

## Supporting Information

### **Structural and thermodynamic study of Ca A- or Co B-site substituted SrFeO<sub>3-δ</sub> perovskites for low temperature chemical looping applications**

Giancarlo Luongo, Felix Donat and Christop R. Müller\*

Laboratory of Energy Science and Engineering, Department of Mechanical and Process Engineering  
ETH Zürich, Leonhardstrasse 21, 8092 Zürich, Switzerland

\*Corresponding author

([muelchri@ethz.ch](mailto:muelchri@ethz.ch) Prof. Christoph Müller)

# 1. Characterisation of the oxygen carriers

## Crystal structure

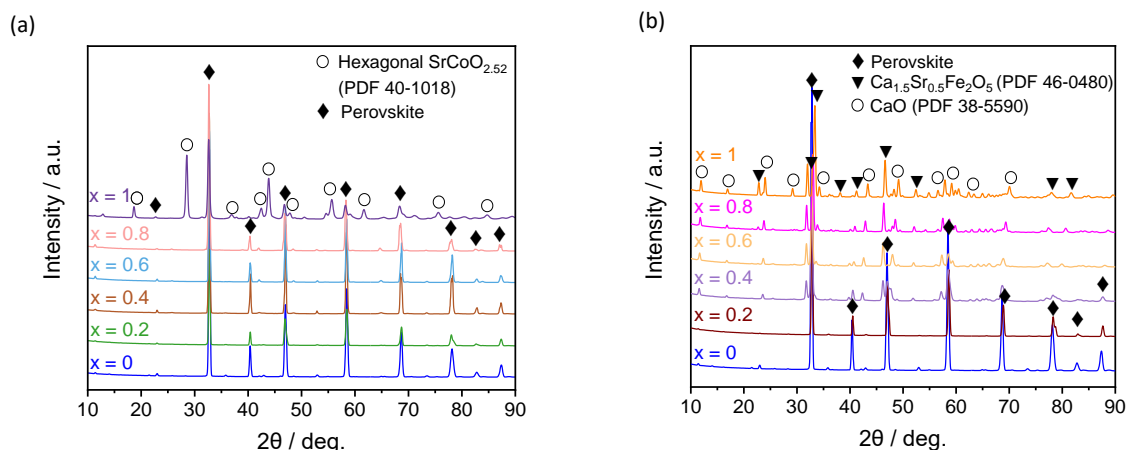

Figure S1 – Synchrotron based XRD patterns of the prepared (a)  $\text{SrFe}_{1-x}\text{Co}_x\text{O}_{3-\delta}$  ( $x = 0, 0.2, 0.4, 0.6, 0.8, 1$ ) and (b)  $\text{Sr}_{1-x}\text{Ca}_x\text{FeO}_{3-\delta}$  ( $x = 0, 0.2, 0.4, 0.6, 0.8, 1$ ) collected at the ID31 beamline of the European Synchrotron Radiation Facility (ESRF). The XRD data were collected using a wavelength of  $\lambda = 0.1770 \text{ \AA}$  (ID31, ESRF) in transmission geometry. The patterns were transformed to  $\lambda = 1.5405 \text{ \AA}$  to compare with the laboratory XRD patterns.

## Composition: ICP-OES results

Table S1 – ICP-OES results of the investigated phase-pure perovskites with composition  $\text{SrFe}_{1-x}\text{Co}_x\text{O}_{3-\delta}$  ( $x = 0, 0.2, 0.4, 0.6, 0.8, 1$ ) and  $\text{Sr}_{1-x}\text{Ca}_x\text{FeO}_{3-\delta}$  ( $x = 0.1, 0.2, 0.25$ ).

| Nominal composition                                     | Elemental chemical composition (atom%) |       |       |       | Composition, as per ICP-OES analysis                    |
|---------------------------------------------------------|----------------------------------------|-------|-------|-------|---------------------------------------------------------|
|                                                         | Ca                                     | Co    | Fe    | Sr    |                                                         |
| $\text{SrFeO}_{3-\delta}$                               | -                                      | -     | -     | -     | $\text{Sr}_{0.99}\text{Fe}_{1.01}\text{O}_{3-\delta}$   |
| $\text{SrFe}_{0.8}\text{Co}_{0.2}\text{O}_{3-\delta}$   | -                                      | 3.80  | 16.20 | 20.00 | $\text{SrFe}_{0.81}\text{Co}_{0.19}\text{O}_{3-\delta}$ |
| $\text{SrFe}_{0.6}\text{Co}_{0.4}\text{O}_{3-\delta}$   | -                                      | 8.00  | 12.00 | 20.00 | $\text{SrFe}_{0.6}\text{Co}_{0.4}\text{O}_{3-\delta}$   |
| $\text{SrFe}_{0.4}\text{Co}_{0.6}\text{O}_{3-\delta}$   | -                                      | 12.01 | 8.00  | 20.01 | $\text{SrFe}_{0.4}\text{Co}_{0.6}\text{O}_{3-\delta}$   |
| $\text{SrFe}_{0.2}\text{Co}_{0.8}\text{O}_{3-\delta}$   | -                                      | 4.20  | 15.80 | 20.00 | $\text{SrFe}_{0.21}\text{Co}_{0.79}\text{O}_{3-\delta}$ |
| $\text{Sr}_{0.9}\text{Ca}_{0.1}\text{FeO}_{3-\delta}$   | 2.00                                   | -     | 20.00 | 18.00 | $\text{Sr}_{0.9}\text{Ca}_{0.1}\text{FeO}_{3-\delta}$   |
| $\text{Sr}_{0.8}\text{Ca}_{0.2}\text{FeO}_{3-\delta}$   | 4.10                                   | -     | 20.00 | 15.90 | $\text{Sr}_{0.8}\text{Ca}_{0.20}\text{FeO}_{3-\delta}$  |
| $\text{Sr}_{0.75}\text{Ca}_{0.25}\text{FeO}_{3-\delta}$ | 5.20                                   | -     | 20.00 | 14.80 | $\text{Sr}_{0.74}\text{Ca}_{0.26}\text{FeO}_{3-\delta}$ |

## Thermogravimetric analysis

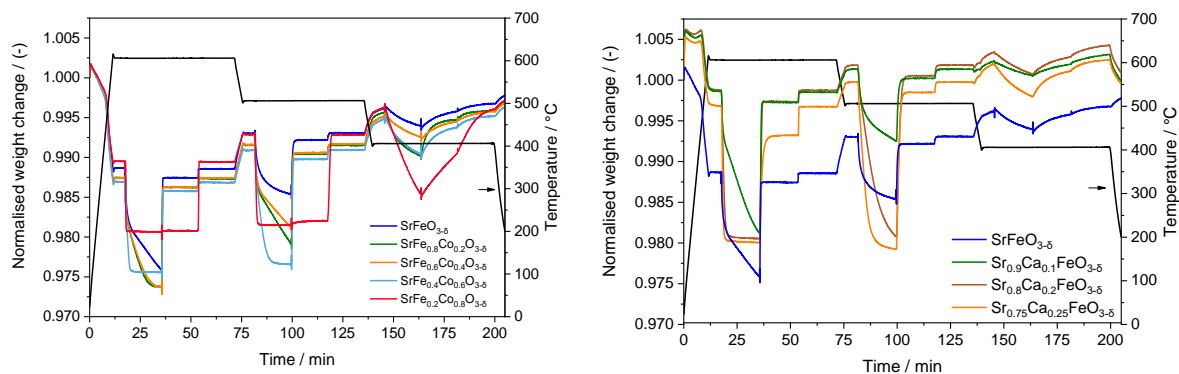

Figure S2 – Thermogravimetric measurements performed on the perovskites with composition  $\text{SrFe}_{1-x}\text{Co}_x\text{O}_{3-\delta}$  ( $x = 0, 0.2, 0.4, 0.6, 0.8, 1$ ) and  $\text{Sr}_{1-x}\text{Ca}_x\text{FeO}_{3-\delta}$  ( $x = 0.1, 0.2, 0.25$ ).

## 2. Oxygen desorption properties

### Cyclic redox stability

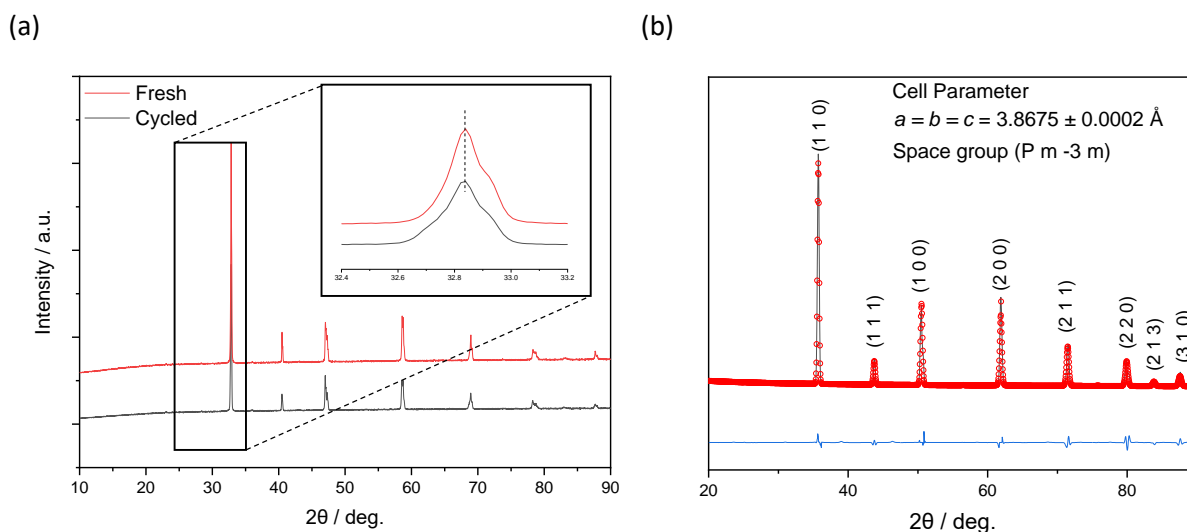

Figure S3 – (a) XRD patterns of the perovskite with composition  $\text{Sr}_{0.8}\text{Ca}_{0.2}\text{FeO}_{3-\delta}$  before and after 30 redox cycles in the TGA at 500°C and (b) full pattern Rietveld refinement of the cycled sample.

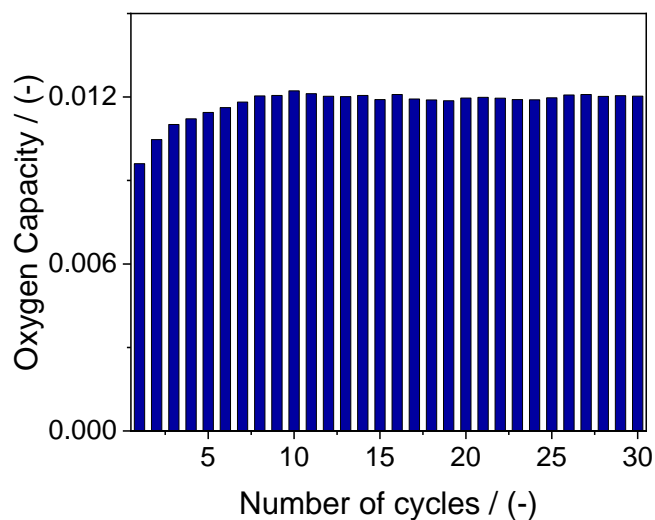

Figure S4 – Oxygen capacity as a function of cycle number, measured in the TGA using the sample  $\text{SrFe}_{0.2}\text{Co}_{0.8}\text{O}_{3-\delta}$  at 500 °C, corresponding to 30 redox cycles (reduction in pure  $\text{N}_2$ , oxidation in air).

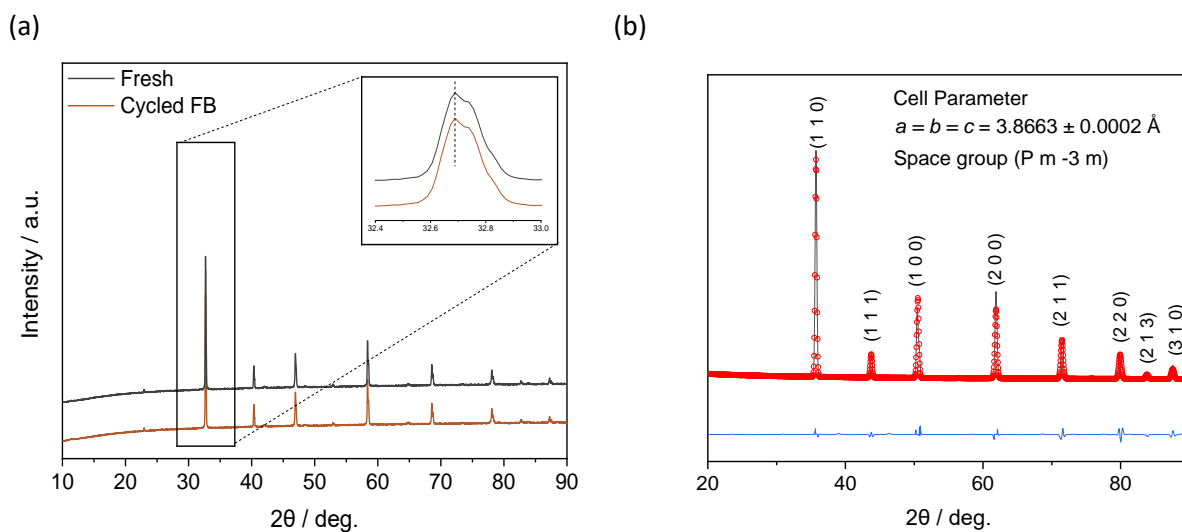

Figure S5 – (a) XRD patterns of the perovskite with composition  $\text{SrFe}_{0.2}\text{Co}_{0.8}\text{FeO}_{3-\delta}$  before and after 30 redox cycles in the TGA at 500°C and (b) full pattern Rietveld refinement of the cycled sample.

Table S2 – Textural characteristics of the oxygen carriers, before and after redox cycling experiments: BET surface area, BJH pore volume

| Sample                                                               | Surface area [ $\text{m}^2 \text{g}^{-1}$ ] | Pore volume [ $\text{cm}^3 \text{g}^{-1}$ ] |
|----------------------------------------------------------------------|---------------------------------------------|---------------------------------------------|
| $\text{SrFe}_{0.2}\text{Co}_{0.8}\text{O}_{3-\delta}$ before cycling | 0.96                                        | 0.001                                       |
| $\text{SrFe}_{0.2}\text{Co}_{0.8}\text{O}_{3-\delta}$ after cycling  | 1.15                                        | 0.003                                       |
| $\text{Sr}_{0.8}\text{Ca}_{0.2}\text{FeO}_{3-\delta}$ before cycling | 1.87                                        | 0.002                                       |
| $\text{Sr}_{0.8}\text{Ca}_{0.2}\text{FeO}_{3-\delta}$ after cycling  | 1.95                                        | 0.0025                                      |

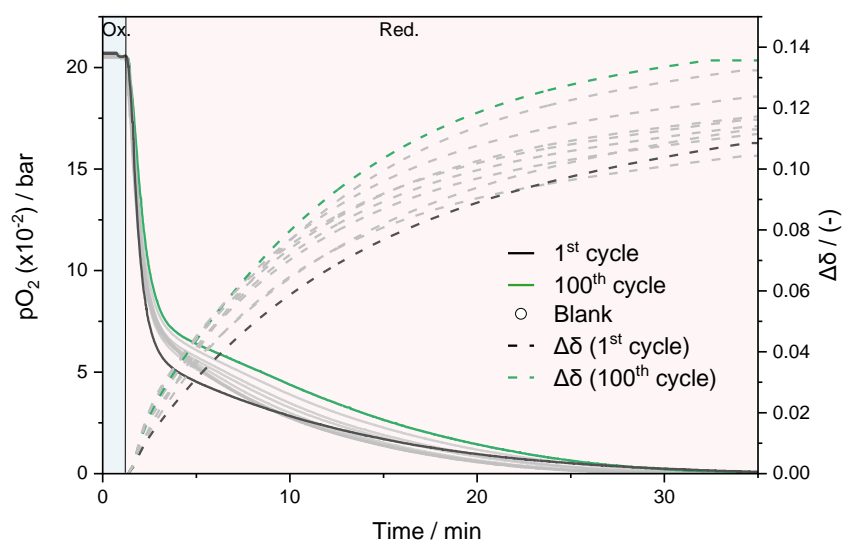

Figure S6 –  $p\text{O}_2$  measured at the outlet of the fixed bed reactor for cycle 1 (black) and cycle 100 (green) with respective evolution of  $\Delta\delta$  (dashed lines) for the material with composition  $\text{SrFe}_{0.2}\text{Co}_{0.8}\text{O}_{3-\delta}$  at  $T = 500 \text{ }^\circ\text{C}$  and  $50 \text{ mL min}^{-1}$  flow of  $\text{N}_2$ . The grey lines represent measurements for every cycle up to number 10.

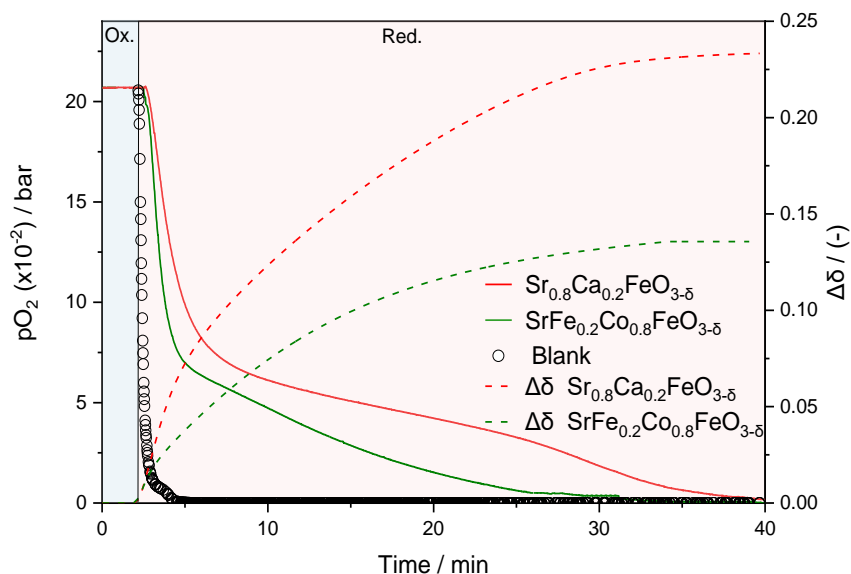

Figure S7 – Comparison of the  $pO_2$  measured at the outlet of the fixed bed reactor for cycle 100 of  $Sr_{0.8}Ca_{0.2}FeO_{3-\delta}$  (red) and  $SrFe_{0.2}Co_{0.8}O_{3-\delta}$  (green) with respective evolution of  $\Delta\delta$  (dashed lines) at  $T = 600\text{ }^\circ\text{C}$  and  $50\text{ mL min}^{-1}$  flow of  $N_2$ .

### 3. Thermodynamic assessment

#### Initial oxygen non-stoichiometry

Table S3 – Results of the iodometric titration for the calculation of the initial oxygen non-stoichiometry at ambient  $T$  and  $p$ .

| Sample                             | $3 - \delta_0$ |
|------------------------------------|----------------|
| $SrFeO_{3-\delta}$                 | 2.78           |
| $SrFe_{0.8}Co_{0.2}O_{3-\delta}$   | 2.77           |
| $SrFe_{0.6}Co_{0.4}O_{3-\delta}$   | 2.76           |
| $SrFe_{0.4}Co_{0.6}O_{3-\delta}$   | 2.78           |
| $SrFe_{0.2}Co_{0.8}O_{3-\delta}$   | 2.68           |
| $Sr_{0.9}Ca_{0.1}FeO_{3-\delta}$   | 2.84           |
| $Sr_{0.8}Ca_{0.2}FeO_{3-\delta}$   | 2.85           |
| $Sr_{0.75}Ca_{0.25}FeO_{3-\delta}$ | 2.84           |

## HP-TG thermogravimetric measurement of $\text{SrFe}_{1-x}\text{Co}_x\text{O}_{3-\delta}$

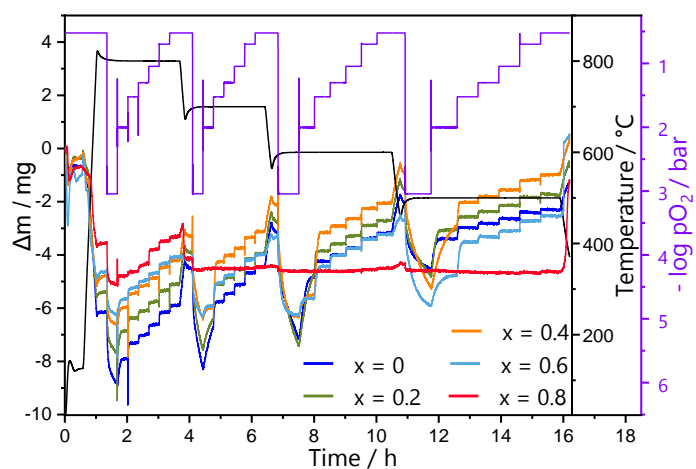

Figure S8 Sample weight change as a function of time,  $T$  and  $p\text{O}_2$  for the samples with composition  $\text{SrFe}_{1-x}\text{Co}_x\text{O}_{3-\delta}$  ( $x = 0, 0.2, 0.4, 0.6, 0.8$ ).

## Phase diagrams for $\text{SrFe}_{1-x}\text{Co}_x\text{O}_{3-\delta}$

(a)

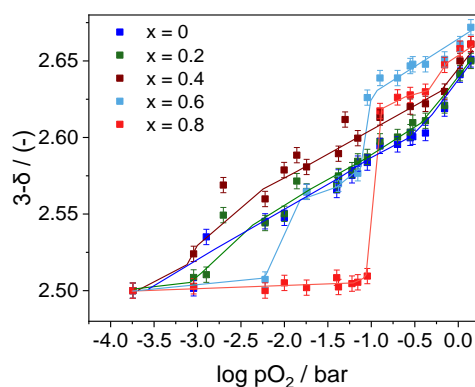

(b)

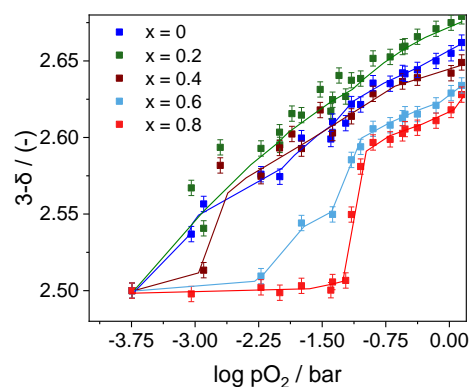

(c)

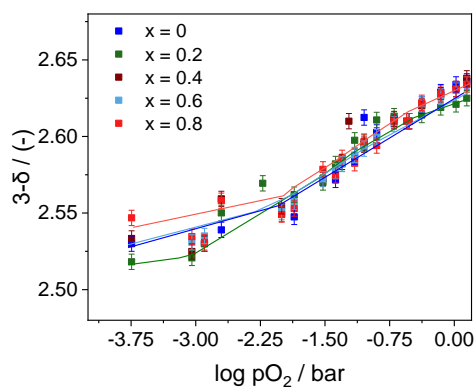

Figure S9 – Measured oxygen non-stoichiometry (symbols) as a function of  $p\text{O}_2$  for the samples with composition  $\text{SrFe}_{1-x}\text{Co}_x\text{O}_{3-\delta}$  ( $x = 0, 0.2, 0.4, 0.6, 0.8$ ) at (a) 600 °C, (b) 700 °C and (c) 800 °C.

## HP-TG thermogravimetric measurement

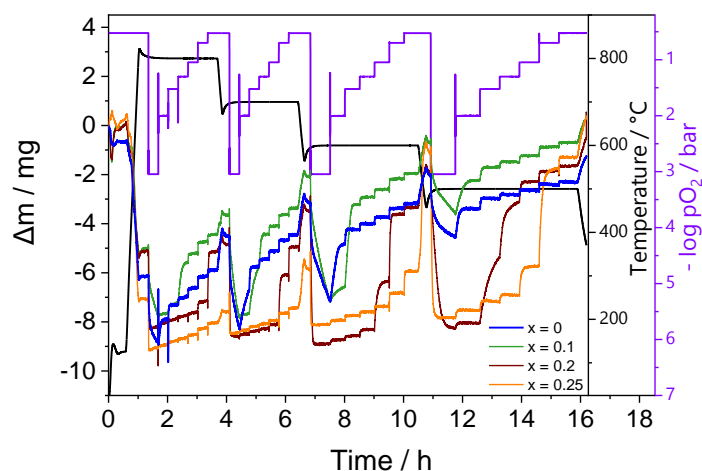

Figure S10 – Sample weight change as a function of time,  $T$  and  $p\text{O}_2$  for the samples with composition  $\text{Sr}_{1-x}\text{Ca}_x\text{FeO}_{3-\delta}$  ( $x = 0.1, 0.2, 0.25$ ).

## Phase diagrams for $\text{Sr}_{1-x}\text{Ca}_x\text{FeO}_{3-\delta}$

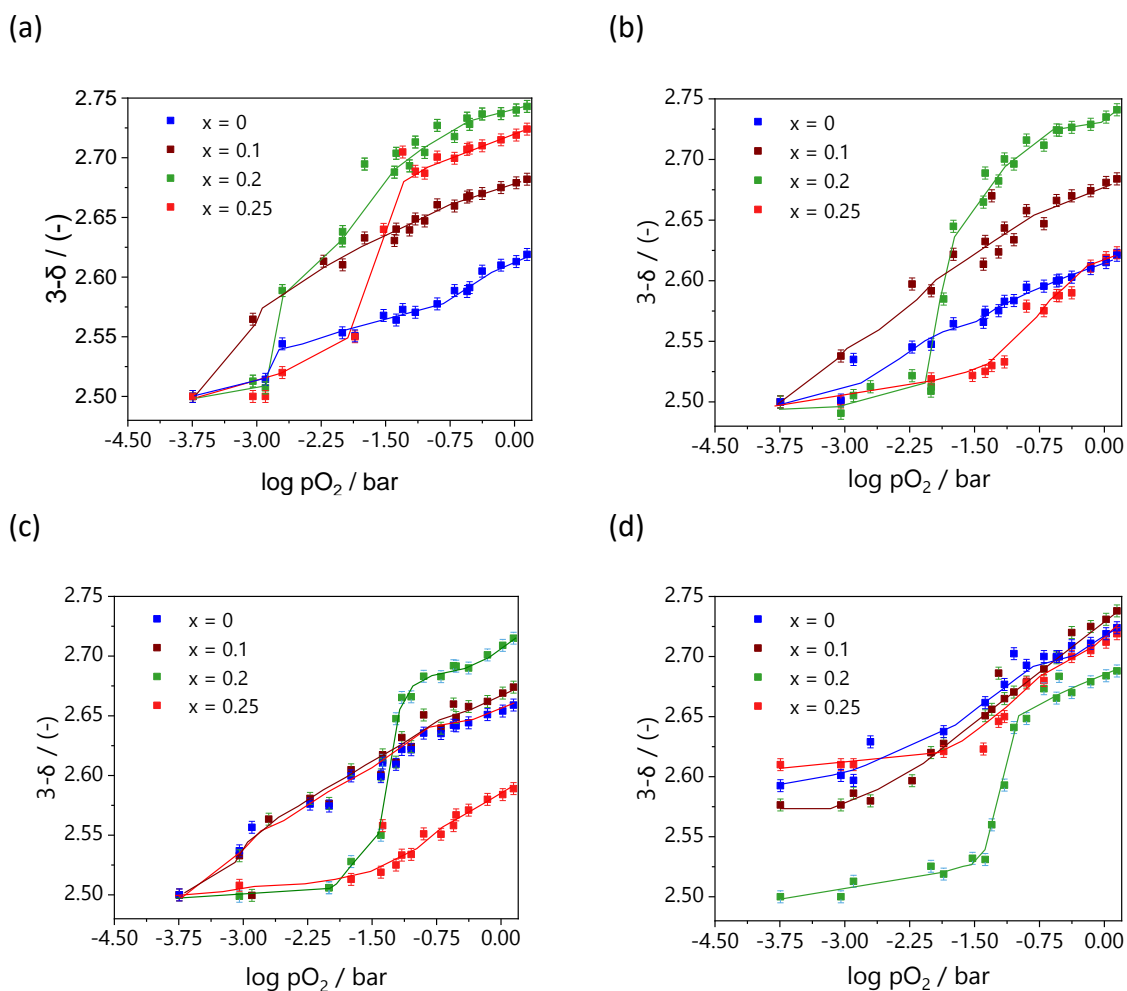

Figure S11 – Measured oxygen non-stoichiometry (symbols) as a function of  $p\text{O}_2$  for the samples with composition  $\text{Sr}_{1-x}\text{Ca}_x\text{FeO}_{3-\delta}$  ( $x = 0, 0.1, 0.2, 0.25$ ) at (a) 500 °C, (b) 600 °C, (c) 700 °C and (d) 800 °C.



Arrhenius plots for  $\text{SrFe}_{1-x}\text{Co}_x\text{O}_{3-\delta}$

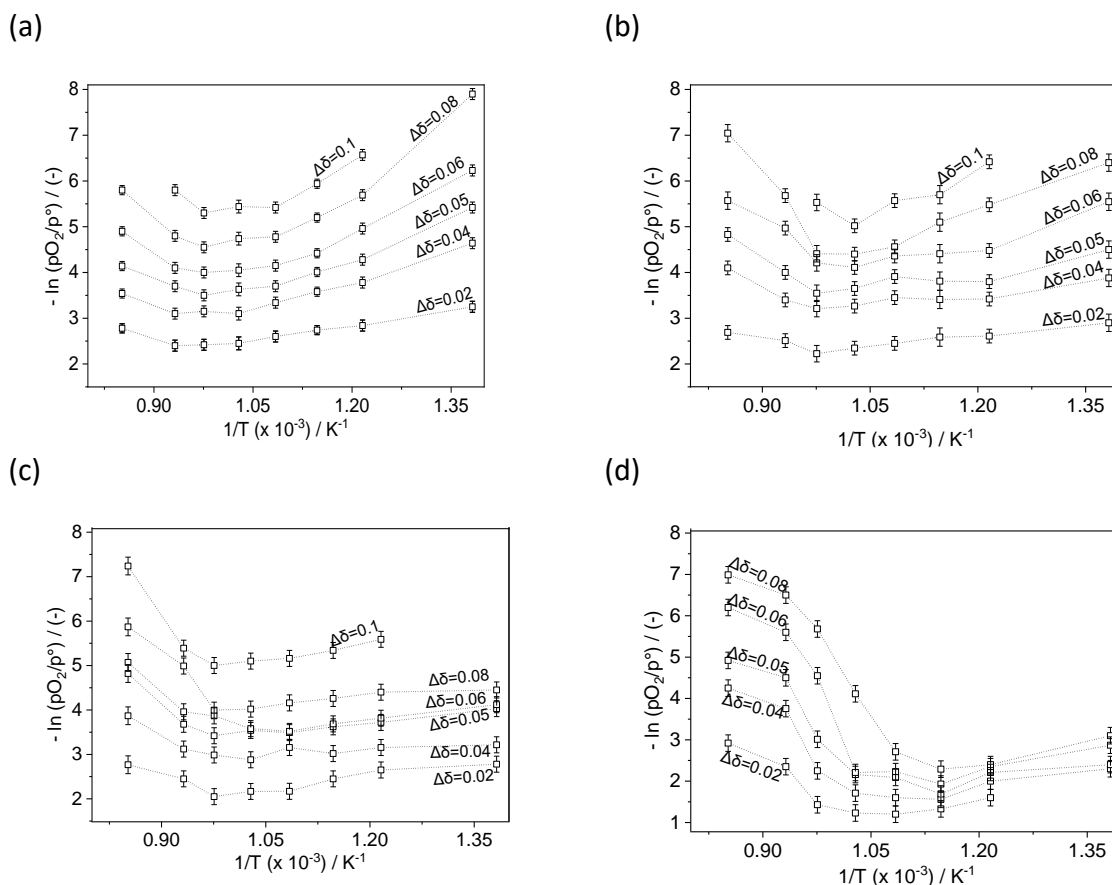

Figure S12 - Arrhenius plots for (a)  $\text{SrFeO}_{3-\delta}$ , (b)  $\text{SrFe}_{0.6}\text{Co}_{0.4}\text{O}_{3-\delta}$ , (c)  $\text{SrFe}_{0.4}\text{Co}_{0.6}\text{O}_{3-\delta}$  and (d)  $\text{SrFe}_{0.2}\text{Co}_{0.8}\text{O}_{3-\delta}$

Arrhenius plots for  $\text{Sr}_{1-x}\text{Ca}_x\text{FeO}_{3-\delta}$

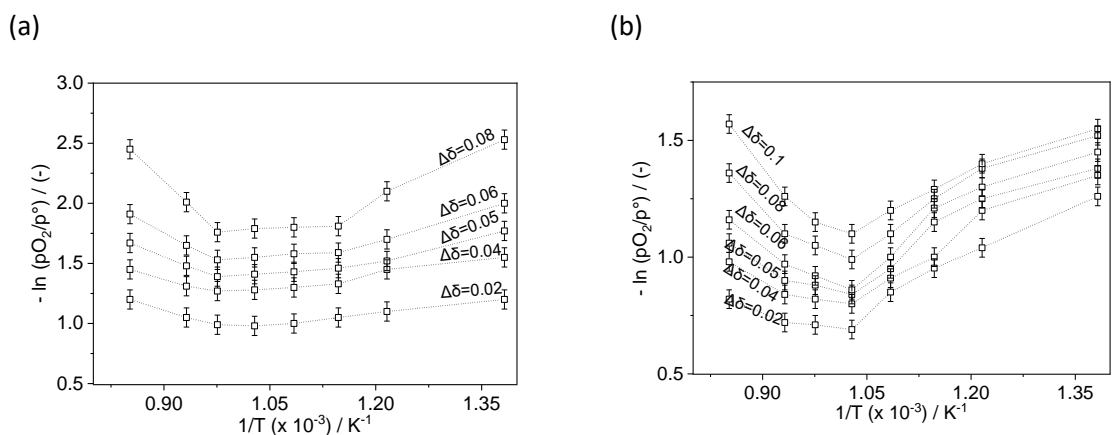

Figure S13 - Arrhenius plots for (a)  $\text{Sr}_{0.9}\text{Ca}_{0.1}\text{FeO}_{3-\delta}$  and (c)  $\text{Sr}_{0.75}\text{Ca}_{0.25}\text{FeO}_{3-\delta}$

## Enthalpy and entropy of formation for $\text{Sr}_{1-x}\text{Ca}_x\text{FeO}_{3-\delta}$

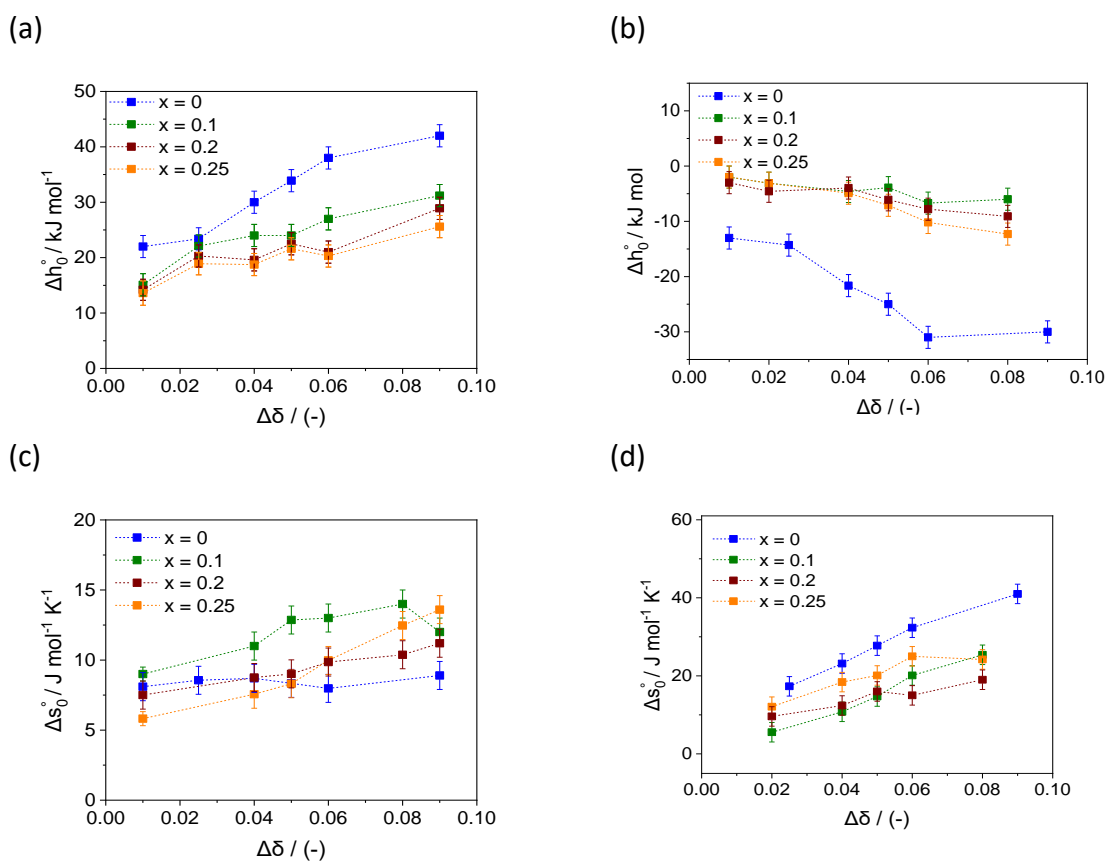

Figure S14 – Evolution of partial molar enthalpy and entropy of formation of vacancies as a function of oxygen non-stoichiometry  $\delta$  in the (a, b) high temperature regime ( $T > \sim 770^\circ\text{C}$ ), and (c, d) low temperature ( $T < \sim 770^\circ\text{C}$ ) respectively, for  $\text{Sr}_{1-x}\text{Ca}_x\text{FeO}_{3-\delta}$ .

Table S4 – Partial molar enthalpy and entropy of vacancy formation of the investigated samples. The values after ± indicate the 95% confidence intervals.

| Temperature < 770 °C |                                        |                                                              |                                                                          |                                                              |                                                                          |                                                              |
|----------------------|----------------------------------------|--------------------------------------------------------------|--------------------------------------------------------------------------|--------------------------------------------------------------|--------------------------------------------------------------------------|--------------------------------------------------------------|
| $\Delta\delta$       | SrFeO <sub>3-<math>\delta</math></sub> |                                                              | SrFe <sub>0.8</sub> Co <sub>0.2</sub> O <sub>3-<math>\delta</math></sub> |                                                              | SrFe <sub>0.6</sub> Co <sub>0.4</sub> O <sub>3-<math>\delta</math></sub> |                                                              |
|                      | $\Delta h_0^\circ$<br>[kJ mol]         | $\Delta s_0^\circ$<br>[J mol <sup>-1</sup> K <sup>-1</sup> ] | $\Delta h_0^\circ$<br>[kJ mol]                                           | $\Delta s_0^\circ$<br>[J mol <sup>-1</sup> K <sup>-1</sup> ] | $\Delta h_0^\circ$<br>[kJ mol]                                           | $\Delta s_0^\circ$<br>[J mol <sup>-1</sup> K <sup>-1</sup> ] |
| 0.01                 | 22.1±0.84                              | 8.1±0.7                                                      | 19±1.92                                                                  | 5±0.5                                                        | 14.5±1.3                                                                 | 6±0.5                                                        |
| 0.025                | 23.4±0.97                              | 8.55±0.72                                                    | 20.1±1.9                                                                 | 5.4±0.5                                                      | 13.6±1.2                                                                 | 7.02±0.53                                                    |
| 0.04                 | 30.1±1.17                              | 8.7±0.75                                                     | 23.8±1                                                                   | 6.15±0.8                                                     | 18.6±1.4                                                                 | 9.75±0.9                                                     |
| 0.05                 | 33.8±1.51                              | 8.3±0.71                                                     | 28.7±1.6                                                                 | 6.26±0.95                                                    | 22.9±1.78                                                                | 11.45±1.06                                                   |
| 0.06                 | 38.2±1.22                              | 8±0.7                                                        | 30.4±1.9                                                                 | 6.45±1.2                                                     | 28±1.2                                                                   | 12.2±1.17                                                    |
| 0.09                 | 42.3±1                                 | 8.9±0.77                                                     | 37±1.5                                                                   | 7.34±0.77                                                    | 28.9±1.32                                                                | 12.82±1.27                                                   |

| Temperature > 770 °C |                                        |                                                              |                                                                          |                                                              |                                                                          |                                                              |
|----------------------|----------------------------------------|--------------------------------------------------------------|--------------------------------------------------------------------------|--------------------------------------------------------------|--------------------------------------------------------------------------|--------------------------------------------------------------|
| $\Delta\delta$       | SrFeO <sub>3-<math>\delta</math></sub> |                                                              | SrFe <sub>0.8</sub> Co <sub>0.2</sub> O <sub>3-<math>\delta</math></sub> |                                                              | SrFe <sub>0.6</sub> Co <sub>0.4</sub> O <sub>3-<math>\delta</math></sub> |                                                              |
|                      | $\Delta h_0^\circ$<br>[kJ mol]         | $\Delta s_0^\circ$<br>[J mol <sup>-1</sup> K <sup>-1</sup> ] | $\Delta h_0^\circ$<br>[kJ mol]                                           | $\Delta s_0^\circ$<br>[J mol <sup>-1</sup> K <sup>-1</sup> ] | $\Delta h_0^\circ$<br>[kJ mol]                                           | $\Delta s_0^\circ$<br>[J mol <sup>-1</sup> K <sup>-1</sup> ] |
| 0.01                 | -13±0.97                               |                                                              | -13.23±1.4                                                               |                                                              | -5.1±1.02                                                                |                                                              |
| 0.025                | -14.3±1.17                             | 17.3±1.1                                                     | -11.1±1.24                                                               | 18.9±1.1                                                     | -7.5±1.78                                                                | 21.6±1.1                                                     |
| 0.04                 | -21.6±1.51                             | 23.15±1.1                                                    | -17.2±1.05                                                               | 26.88±1.1                                                    | -8.9±1.54                                                                | 32.4±1.1                                                     |
| 0.05                 | -25.1±1.22                             | 27.74±1.5                                                    | -19.05±1.74                                                              | 34.9±1.5                                                     | -10.4±1.6                                                                | 44.29±1.5                                                    |
| 0.06                 | -31.05±1                               | 32.33±1.45                                                   | -25.2±1.6                                                                | 40.9±1.45                                                    | -7.6±1.25                                                                | 53.19±1.45                                                   |
| 0.09                 | -30.1±1.2                              | 53.5±1.36                                                    | -22.3±1.53                                                               | 46.3±1.36                                                    | -9.1±1.55                                                                | 64.27±1.36                                                   |

| Temperature < 770 °C |                                                                          |                                                              |                                                                          |                                                              |                                                                          |                                                              |
|----------------------|--------------------------------------------------------------------------|--------------------------------------------------------------|--------------------------------------------------------------------------|--------------------------------------------------------------|--------------------------------------------------------------------------|--------------------------------------------------------------|
| $\Delta\delta$       | SrFe <sub>0.4</sub> Co <sub>0.6</sub> O <sub>3-<math>\delta</math></sub> |                                                              | SrFe <sub>0.2</sub> Co <sub>0.8</sub> O <sub>3-<math>\delta</math></sub> |                                                              | Sr <sub>0.9</sub> Ca <sub>0.1</sub> FeO <sub>3-<math>\delta</math></sub> |                                                              |
|                      | $\Delta h_0^\circ$<br>[kJ mol]                                           | $\Delta s_0^\circ$<br>[J mol <sup>-1</sup> K <sup>-1</sup> ] | $\Delta h_0^\circ$<br>[kJ mol]                                           | $\Delta s_0^\circ$<br>[J mol <sup>-1</sup> K <sup>-1</sup> ] | $\Delta h_0^\circ$<br>[kJ mol]                                           | $\Delta s_0^\circ$<br>[J mol <sup>-1</sup> K <sup>-1</sup> ] |
| 0.01                 | 10±2                                                                     | 7±1.2                                                        | 8±1.2                                                                    | 3±1.2                                                        | 10.8±0.37                                                                | 5.87±1.13                                                    |
| 0.025                | 11.8±1.91                                                                | 6.3±1.65                                                     | 11.8±1.91                                                                | 2.9±1.65                                                     | 12.2±0.69                                                                | 7.56±1.15                                                    |
| 0.04                 | 15±1.5                                                                   | 8.13±1.38                                                    | 10±1.5                                                                   | 3.06±1.38                                                    | 14.6±0.54                                                                | 8.31±1.26                                                    |
| 0.05                 | 17.7±1.6                                                                 | 9.18±1.                                                      | 11.29±1.6                                                                | 3.35±1                                                       | 16.9±0.87                                                                | 9.97±1.18                                                    |
| 0.06                 | 19.8±1.54                                                                | 9.28±1.2                                                     | 12.3±1.54                                                                | 4.3±1.2                                                      | 19.7±1.1                                                                 | 12.4±1.1                                                     |
| 0.09                 | 23±1.54                                                                  | 11.57±1.05                                                   | 18.6±1.91                                                                | 6.78±1.05                                                    |                                                                          |                                                              |

| Temperature > 770 °C |                                                                          |                                                              |                                                                          |                                                              |                                                                          |                                                              |
|----------------------|--------------------------------------------------------------------------|--------------------------------------------------------------|--------------------------------------------------------------------------|--------------------------------------------------------------|--------------------------------------------------------------------------|--------------------------------------------------------------|
| $\Delta\delta$       | SrFe <sub>0.4</sub> Co <sub>0.6</sub> O <sub>3-<math>\delta</math></sub> |                                                              | SrFe <sub>0.2</sub> Co <sub>0.8</sub> O <sub>3-<math>\delta</math></sub> |                                                              | Sr <sub>0.9</sub> Ca <sub>0.1</sub> FeO <sub>3-<math>\delta</math></sub> |                                                              |
|                      | $\Delta h_0^\circ$<br>[kJ mol]                                           | $\Delta s_0^\circ$<br>[J mol <sup>-1</sup> K <sup>-1</sup> ] | $\Delta h_0^\circ$<br>[kJ mol]                                           | $\Delta s_0^\circ$<br>[J mol <sup>-1</sup> K <sup>-1</sup> ] | $\Delta h_0^\circ$<br>[kJ mol]                                           | $\Delta s_0^\circ$<br>[J mol <sup>-1</sup> K <sup>-1</sup> ] |
| 0.01                 | -0.5±0.94                                                                | 27.45±1.24                                                   | -0.86±0.88                                                               | 36.6±1.74                                                    | 1.19±0.65                                                                | 5.55±1.1                                                     |
| 0.025                | -0.59±1.15                                                               | 50.6±1.54                                                    | -0.9±1.24                                                                | 50.8±1.55                                                    | 1.57±0.98                                                                | 10.8±1.34                                                    |
| 0.04                 | -0.52±1.35                                                               | 64.6±1.44                                                    | -2.87±1.35                                                               | 60.5±1.35                                                    | 1.93±1.2                                                                 | 14.7±1.32                                                    |
| 0.05                 | -0.51±1.42                                                               | 64.2±1.32                                                    | -2.8±1.21                                                                | 70.79±1.43                                                   | 2.43±1.06                                                                | 20.1±1.1                                                     |
| 0.06                 | -1.01±0.97                                                               | 81.13±1.3                                                    | -2.78±1.1                                                                | 80.1±1.4                                                     | 4.18±1.1                                                                 | 25.4±1                                                       |

| Temperature < 770 °C |                                                       |                                |                                                         |                                                              |
|----------------------|-------------------------------------------------------|--------------------------------|---------------------------------------------------------|--------------------------------------------------------------|
| $\Delta\delta$       | $\text{Sr}_{0.8}\text{Ca}_{0.2}\text{FeO}_{3-\delta}$ |                                | $\text{Sr}_{0.75}\text{Ca}_{0.25}\text{FeO}_{3-\delta}$ |                                                              |
|                      | $\Delta h_0^\circ$<br>[kJ mol]                        | $\Delta s_0^\circ$<br>[kJ mol] | $\Delta h_0^\circ$<br>[kJ mol]                          | $\Delta s_0^\circ$<br>[J mol <sup>-1</sup> K <sup>-1</sup> ] |
| 0.01                 | 11.1±0.98                                             | 2.18±1.35                      | 10.6±0.75                                               | 8.16±1.48                                                    |
| 0.025                | 13.6±1.12                                             | 3.14±1.45                      | 14.1±0.56                                               | 9.86±1.44                                                    |
| 0.04                 | 15.7±1.15                                             | 3.54±1.6                       | 17.6±0.96                                               | 12.85±1.39                                                   |
| 0.05                 | 19.4±1.2                                              | 4.65±1.58                      | 25.6±1.02                                               | 15.95±1.25                                                   |
| 0.06                 | 21.1±1.1                                              | 5.02±1.41                      | 28.1±0.87                                               | 24.63±1.65                                                   |
| 0.09                 |                                                       |                                |                                                         |                                                              |

| Temperature > 770 °C |                                                       |                                |                                                         |                                                              |
|----------------------|-------------------------------------------------------|--------------------------------|---------------------------------------------------------|--------------------------------------------------------------|
| $\Delta\delta$       | $\text{Sr}_{0.8}\text{Ca}_{0.2}\text{FeO}_{3-\delta}$ |                                | $\text{Sr}_{0.75}\text{Ca}_{0.25}\text{FeO}_{3-\delta}$ |                                                              |
|                      | $\Delta h_0^\circ$<br>[kJ mol]                        | $\Delta s_0^\circ$<br>[kJ mol] | $\Delta h_0^\circ$<br>[kJ mol]                          | $\Delta s_0^\circ$<br>[J mol <sup>-1</sup> K <sup>-1</sup> ] |
| 0.01                 | -4.56±0.68                                            | 9.6±1.35                       | -3.1±0.89                                               | 12.1±1.56                                                    |
| 0.025                | -3.97±0.96                                            | 12.4±1.22                      | -4.9±0.96                                               | 18.4±1.85                                                    |
| 0.04                 | -6.1±0.93                                             | 16.2±1.46                      | -7.1±0.87                                               | 20.1±1.9                                                     |
| 0.05                 | -7.8±0.78                                             | 15±1.54                        | -10.2±0.88                                              | 25±1.85                                                      |
| 0.06                 | -9.1±1                                                | 19.1±1.5                       | -12.3±1.4                                               | 24.2±1.7                                                     |

#### 4. In-situ XRD results

(a)  $T = 600\text{ }^{\circ}\text{C}$ ,  $\text{SrFeO}_{3-\delta}$

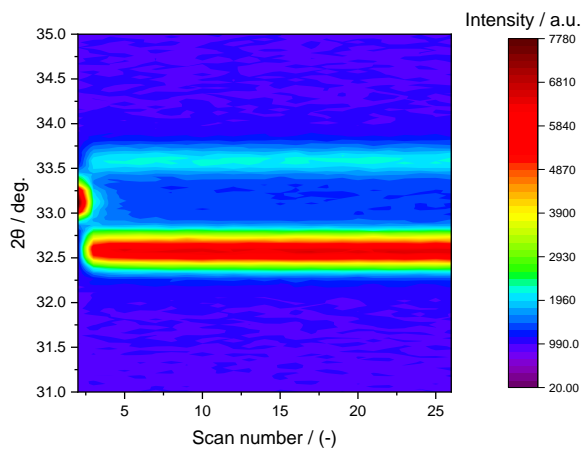

(b)  $T = 900\text{ }^{\circ}\text{C}$ ,  $\text{SrFeO}_{3-\delta}$

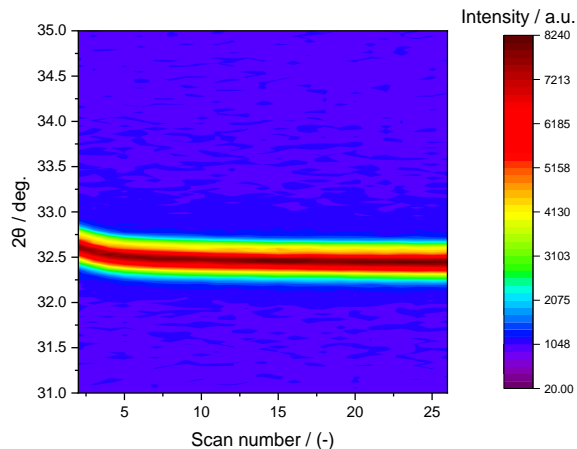

(c)  $T = 600\text{ }^{\circ}\text{C}$ ,  $\text{SrFe}_{0.6}\text{Co}_{0.4}\text{O}_{3-\delta}$

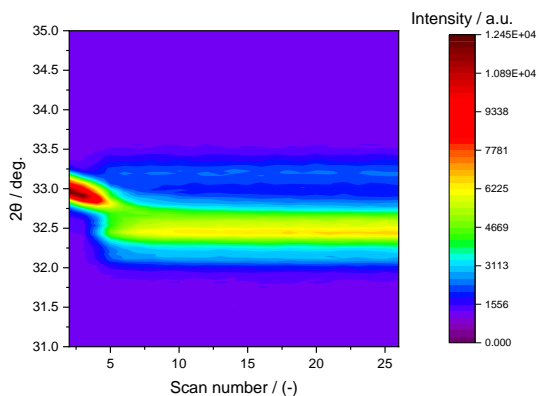

(d)  $T = 900\text{ }^{\circ}\text{C}$ ,  $\text{SrFe}_{0.6}\text{Co}_{0.4}\text{O}_{3-\delta}$

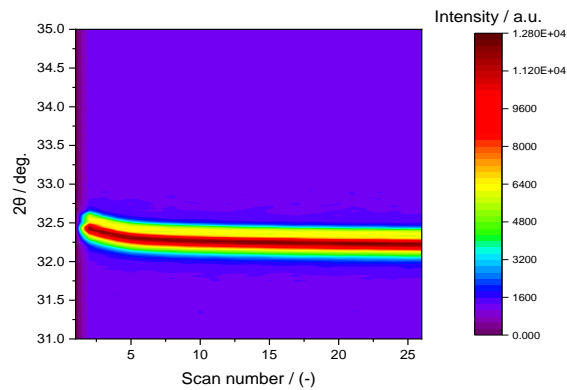

(e)  $T = 600\text{ }^{\circ}\text{C}$ ,  $\text{SrFe}_{0.4}\text{Co}_{0.6}\text{O}_{3-\delta}$

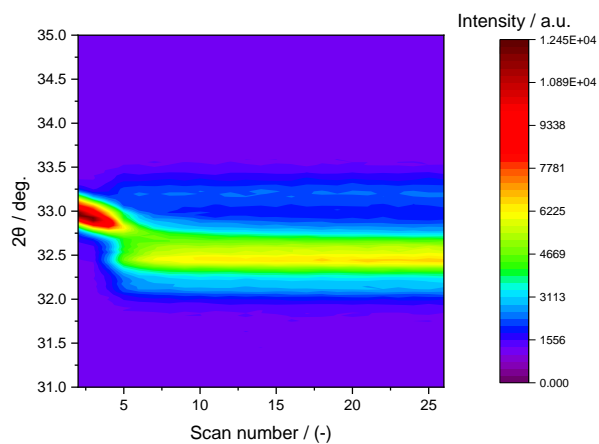

(f)  $T = 900\text{ }^{\circ}\text{C}$ ,  $\text{SrFe}_{0.4}\text{Co}_{0.6}\text{O}_{3-\delta}$

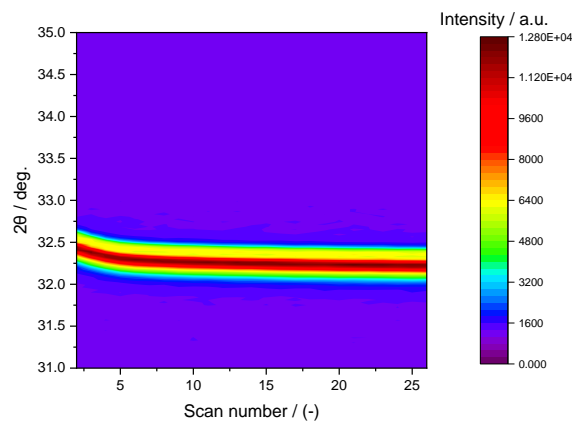

(g)  $T = 600\text{ }^{\circ}\text{C}$ ,  $\text{SrFe}_{0.2}\text{Co}_{0.8}\text{O}_{3-\delta}$

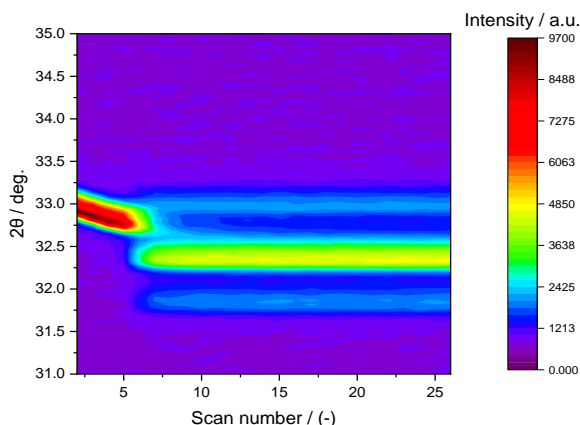

(h)  $T = 900\text{ }^{\circ}\text{C}$ ,  $\text{SrFe}_{0.2}\text{Co}_{0.8}\text{O}_{3-\delta}$

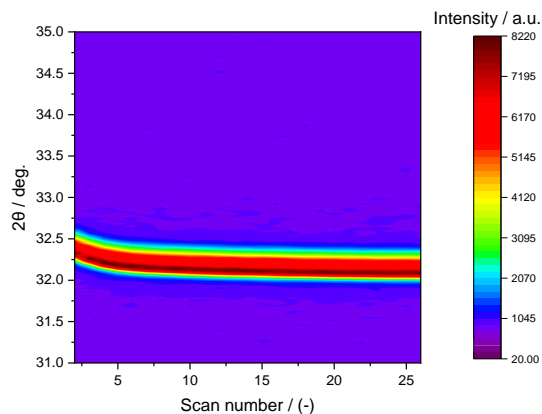

(i)  $T = 600\text{ }^{\circ}\text{C}$ ,  $\text{Sr}_{0.9}\text{Ca}_{0.1}\text{FeO}_{3-\delta}$

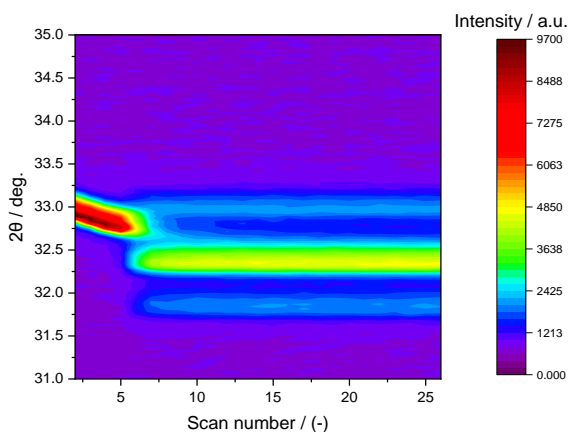

(j)  $T = 900\text{ }^{\circ}\text{C}$ ,  $\text{Sr}_{0.9}\text{Ca}_{0.1}\text{FeO}_{3-\delta}$

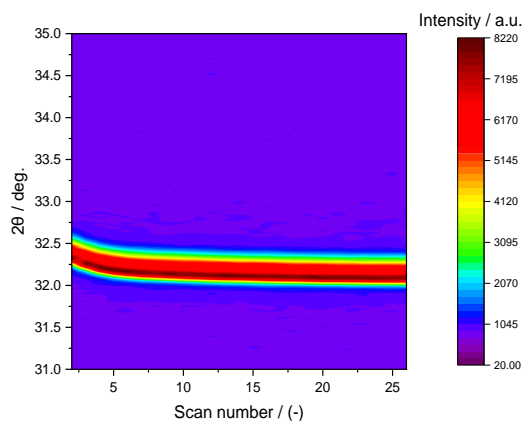

(k)  $T = 600\text{ }^{\circ}\text{C}$ ,  $\text{Sr}_{0.75}\text{Ca}_{0.25}\text{FeO}_{3-\delta}$

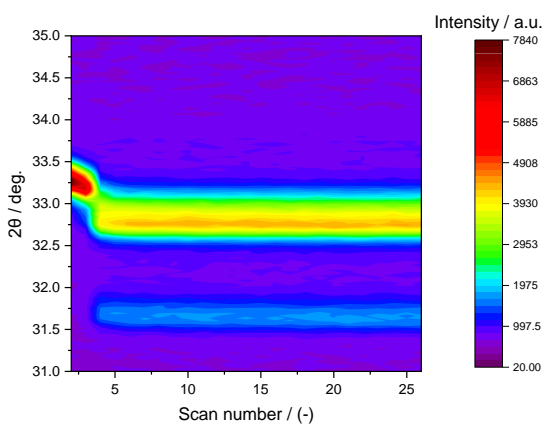

(l)  $T = 900\text{ }^{\circ}\text{C}$ ,  $\text{Sr}_{0.75}\text{Ca}_{0.25}\text{FeO}_{3-\delta}$

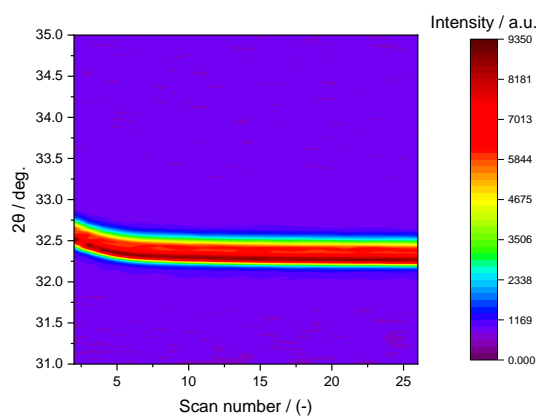

Figure S15 – *In-situ* XRD patterns of  $\text{SrFe}_{1-x}\text{Co}_x\text{O}_{3-\delta}$  ( $x = 0, 0.4, 0.6, 0.8$ ) and  $\text{Sr}_{1-x}\text{Ca}_x\text{FeO}_{3-\delta}$  ( $x = 0.1, 0.25$ ) at  $T = 600\text{ }^{\circ}\text{C}$  and  $T = 900\text{ }^{\circ}\text{C}$ , when switching the gas atmosphere from air ( $p\text{O}_2 = 2.09 \cdot 10^{-1}\text{ bar}$ ) to pure  $\text{N}_2$  ( $p\text{O}_2 = 7.09 \cdot 10^{-5}\text{ bar}$ ) after scan number 2.
